# Supplementary figures and images for: A Mathematical Description of the Bone Marrow Dynamics of CAR T-Cell Therapy in B-cell Childhood Acute Lymphoblastic Leukemia
Source: Preprints.org preprint supplement (doi:10.20944/preprints202105.0323.v1), 2021-05-14

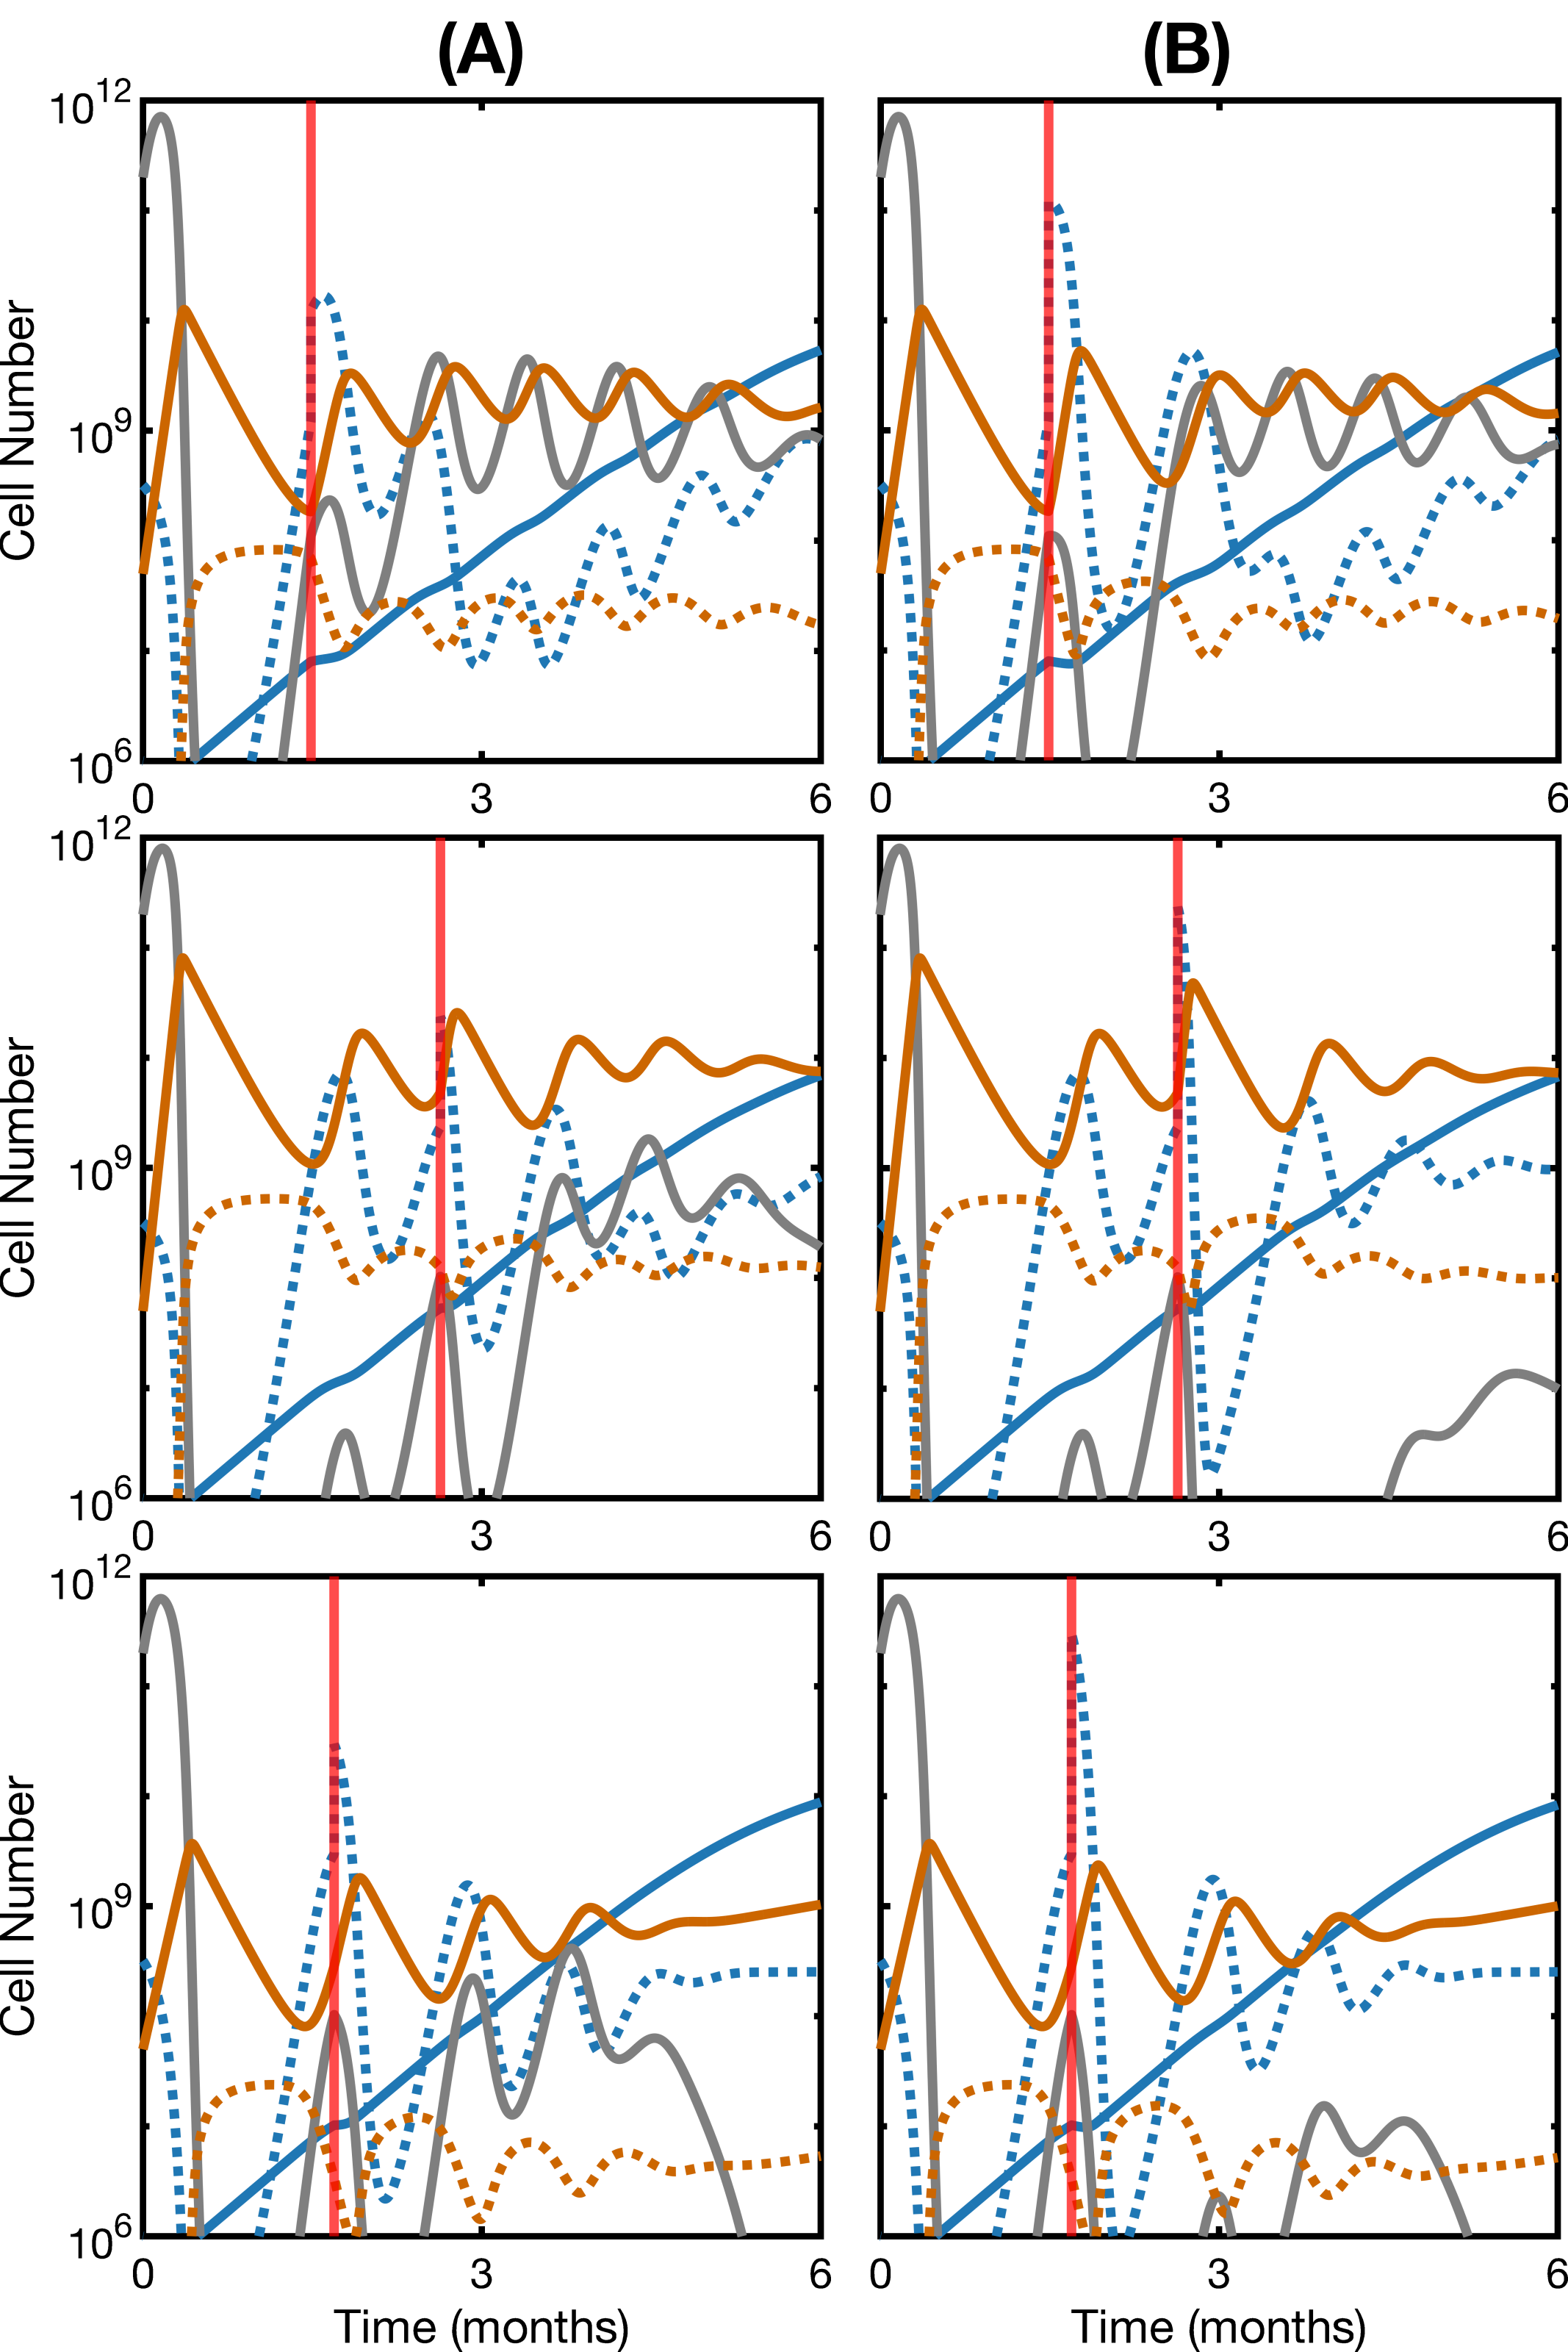

Supplement: Supplementary file 1 [file supplementary]

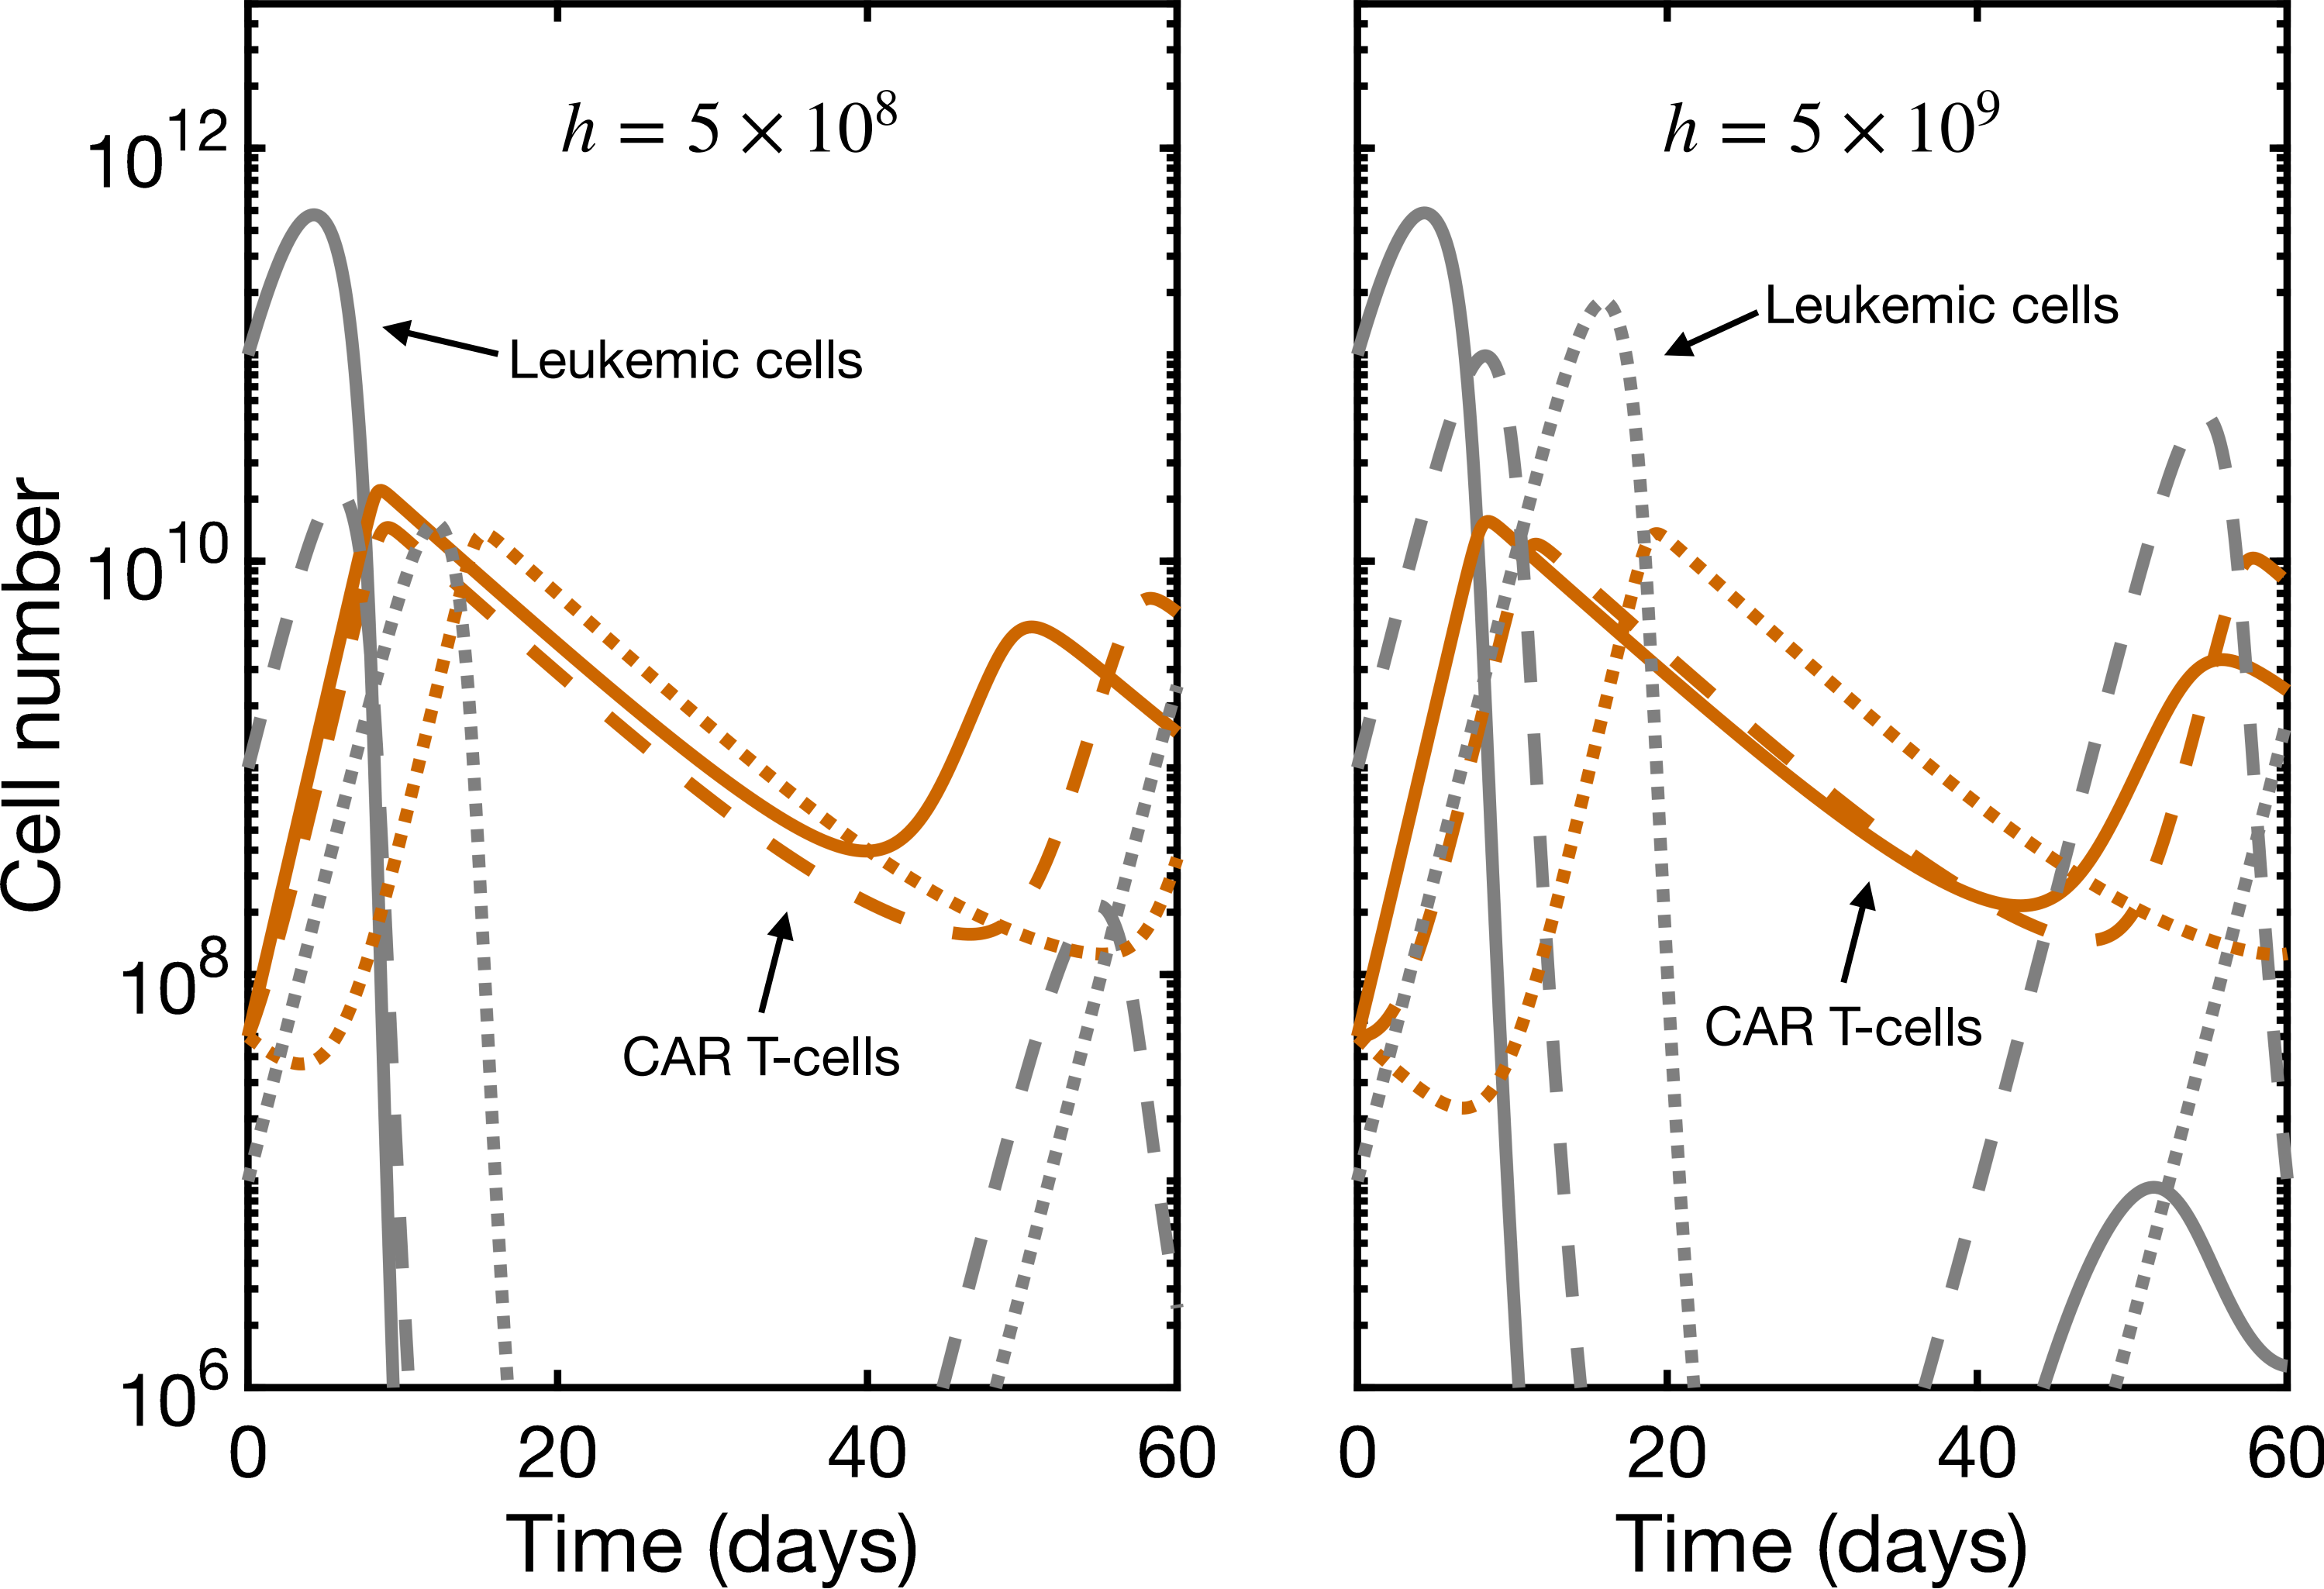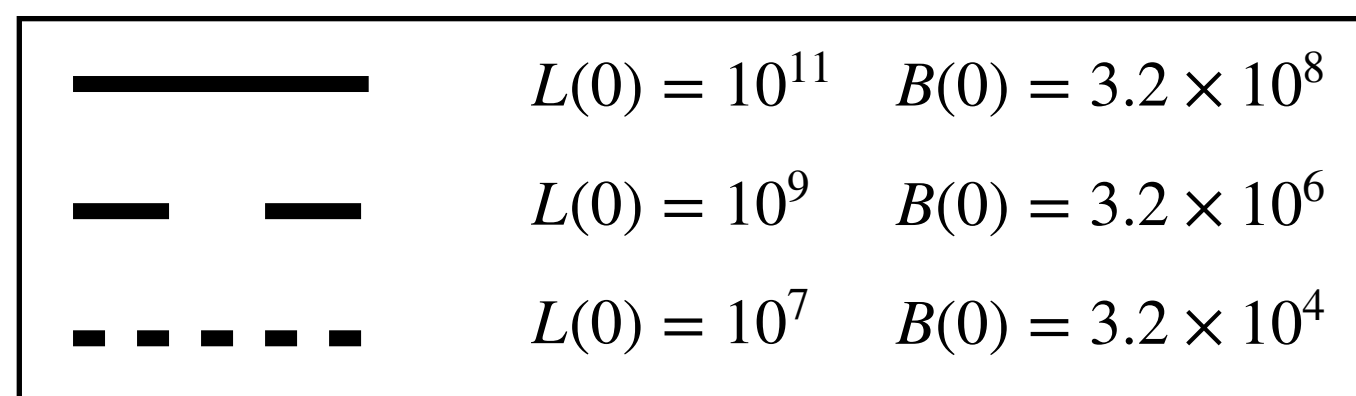

Supplement: Supplementary file 3 [file supplementary]

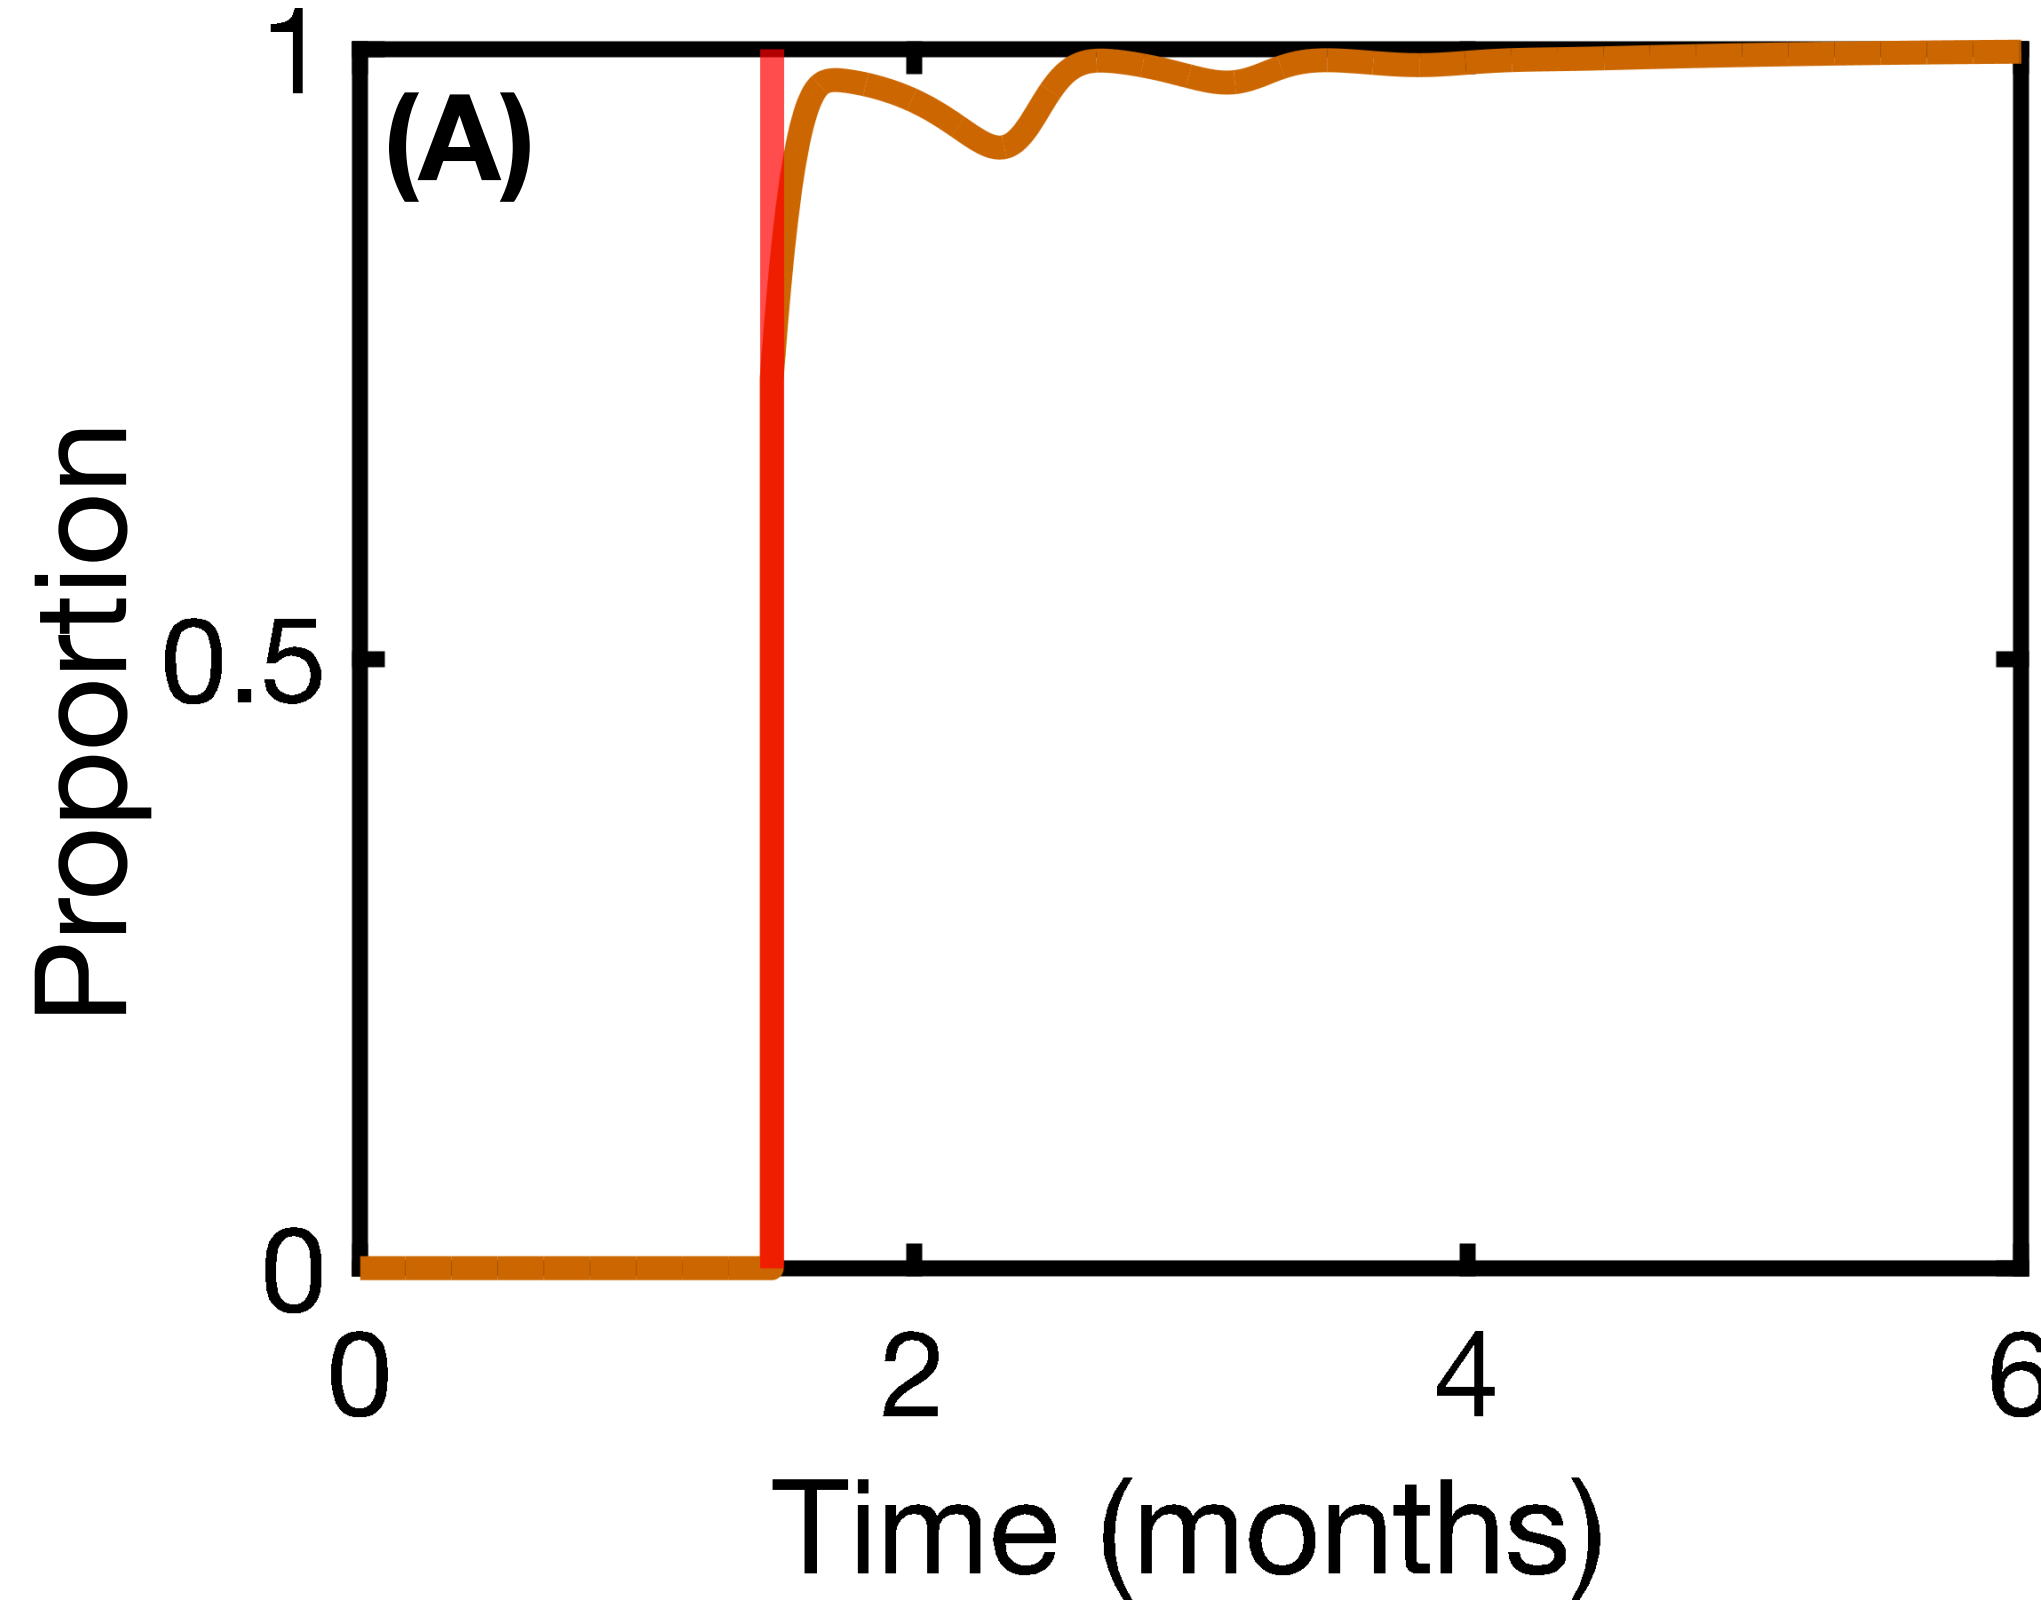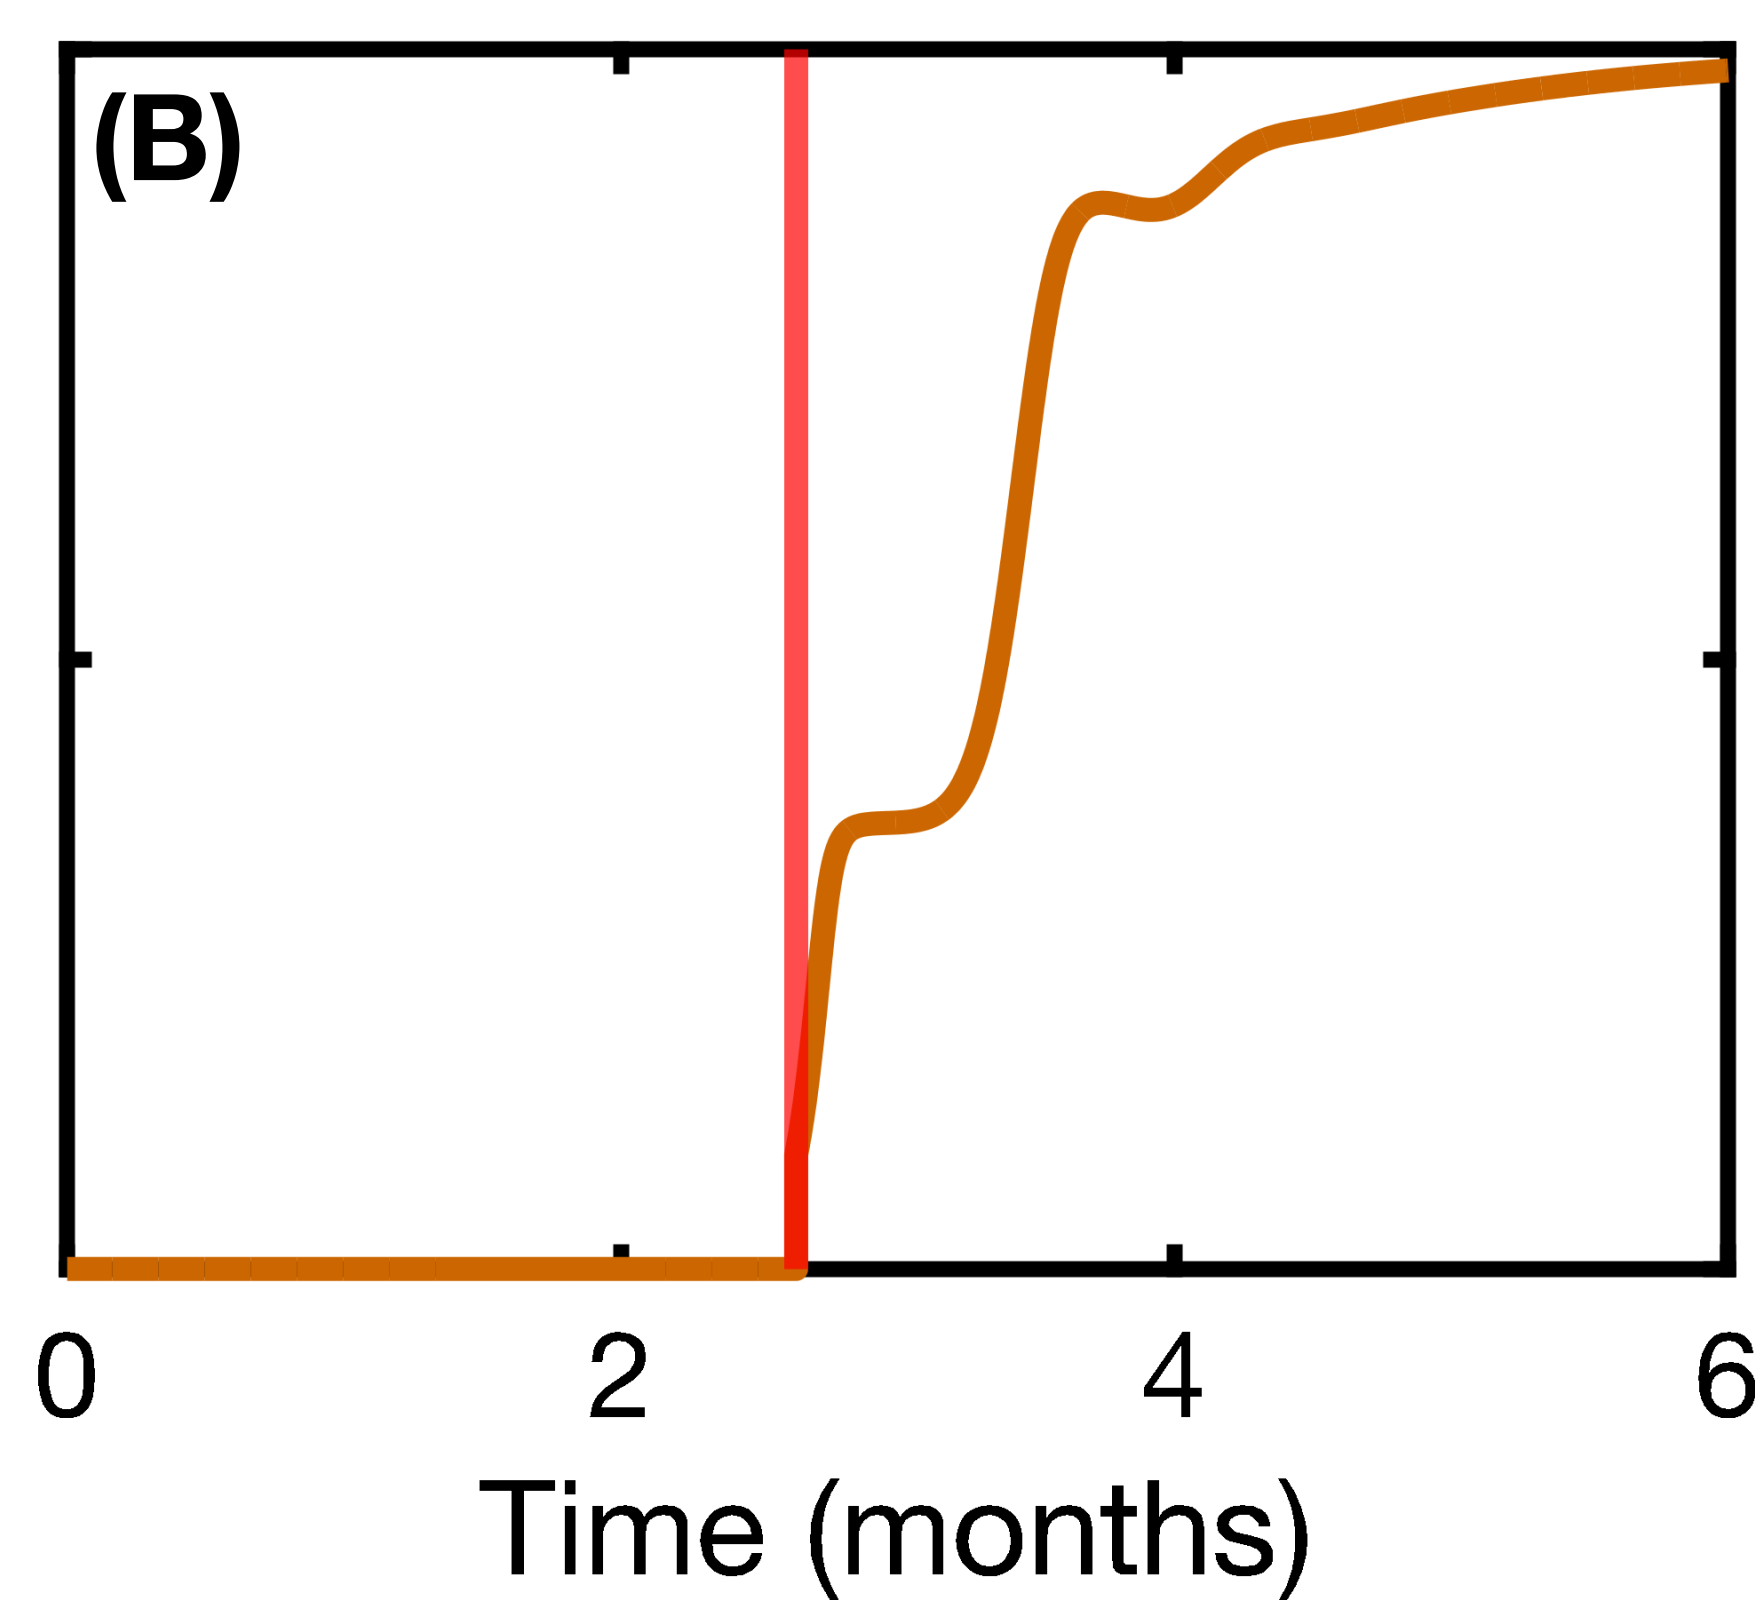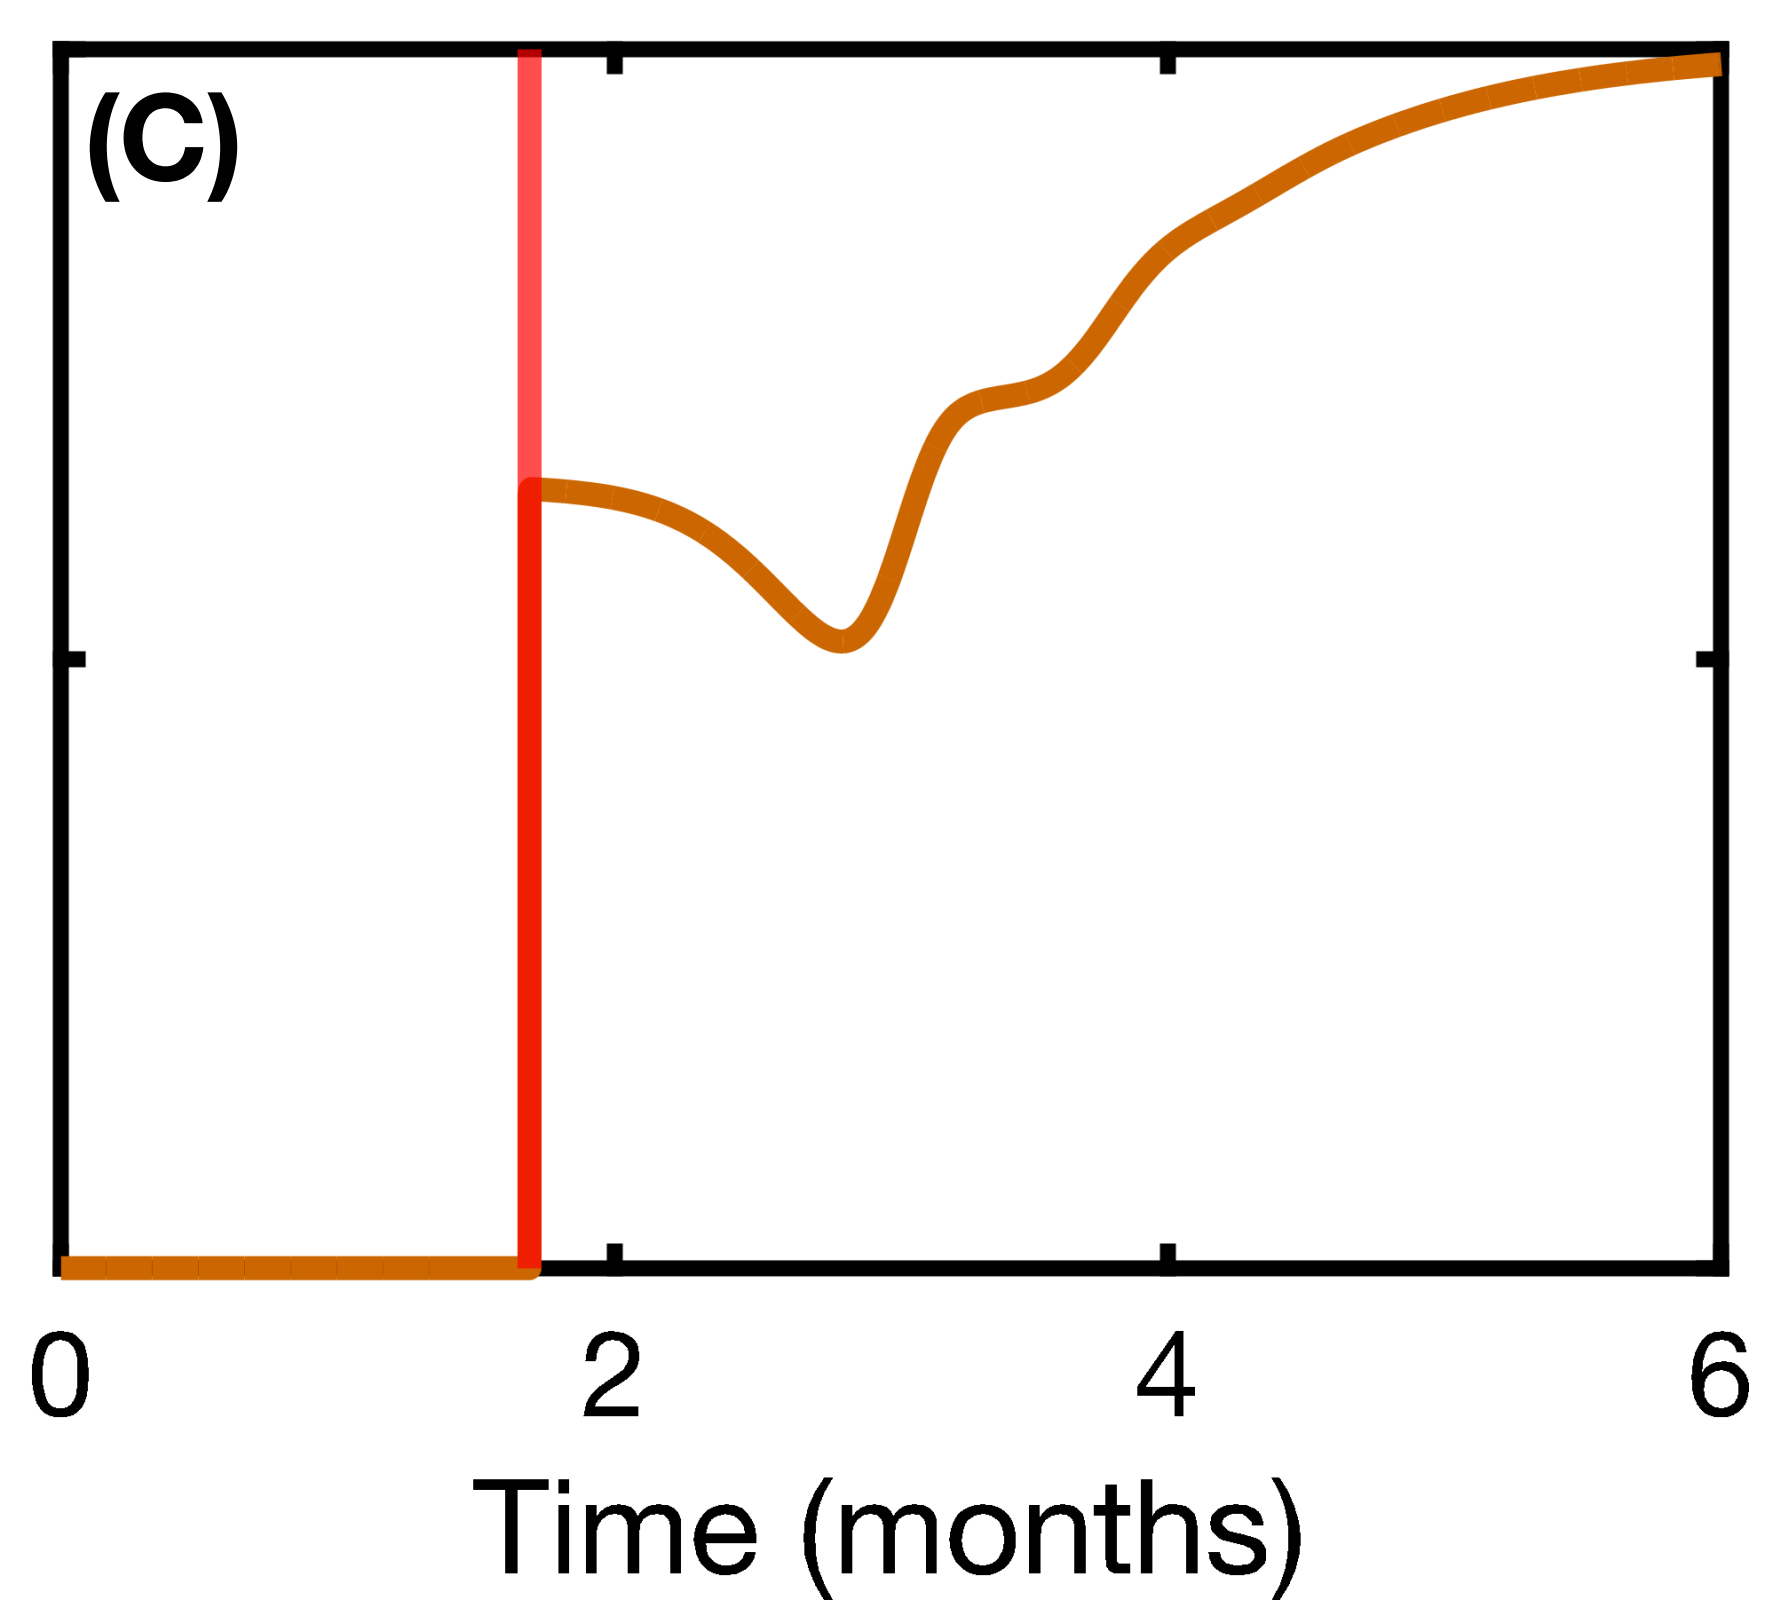

Supplement: Supplementary file 6 [file supplementary]

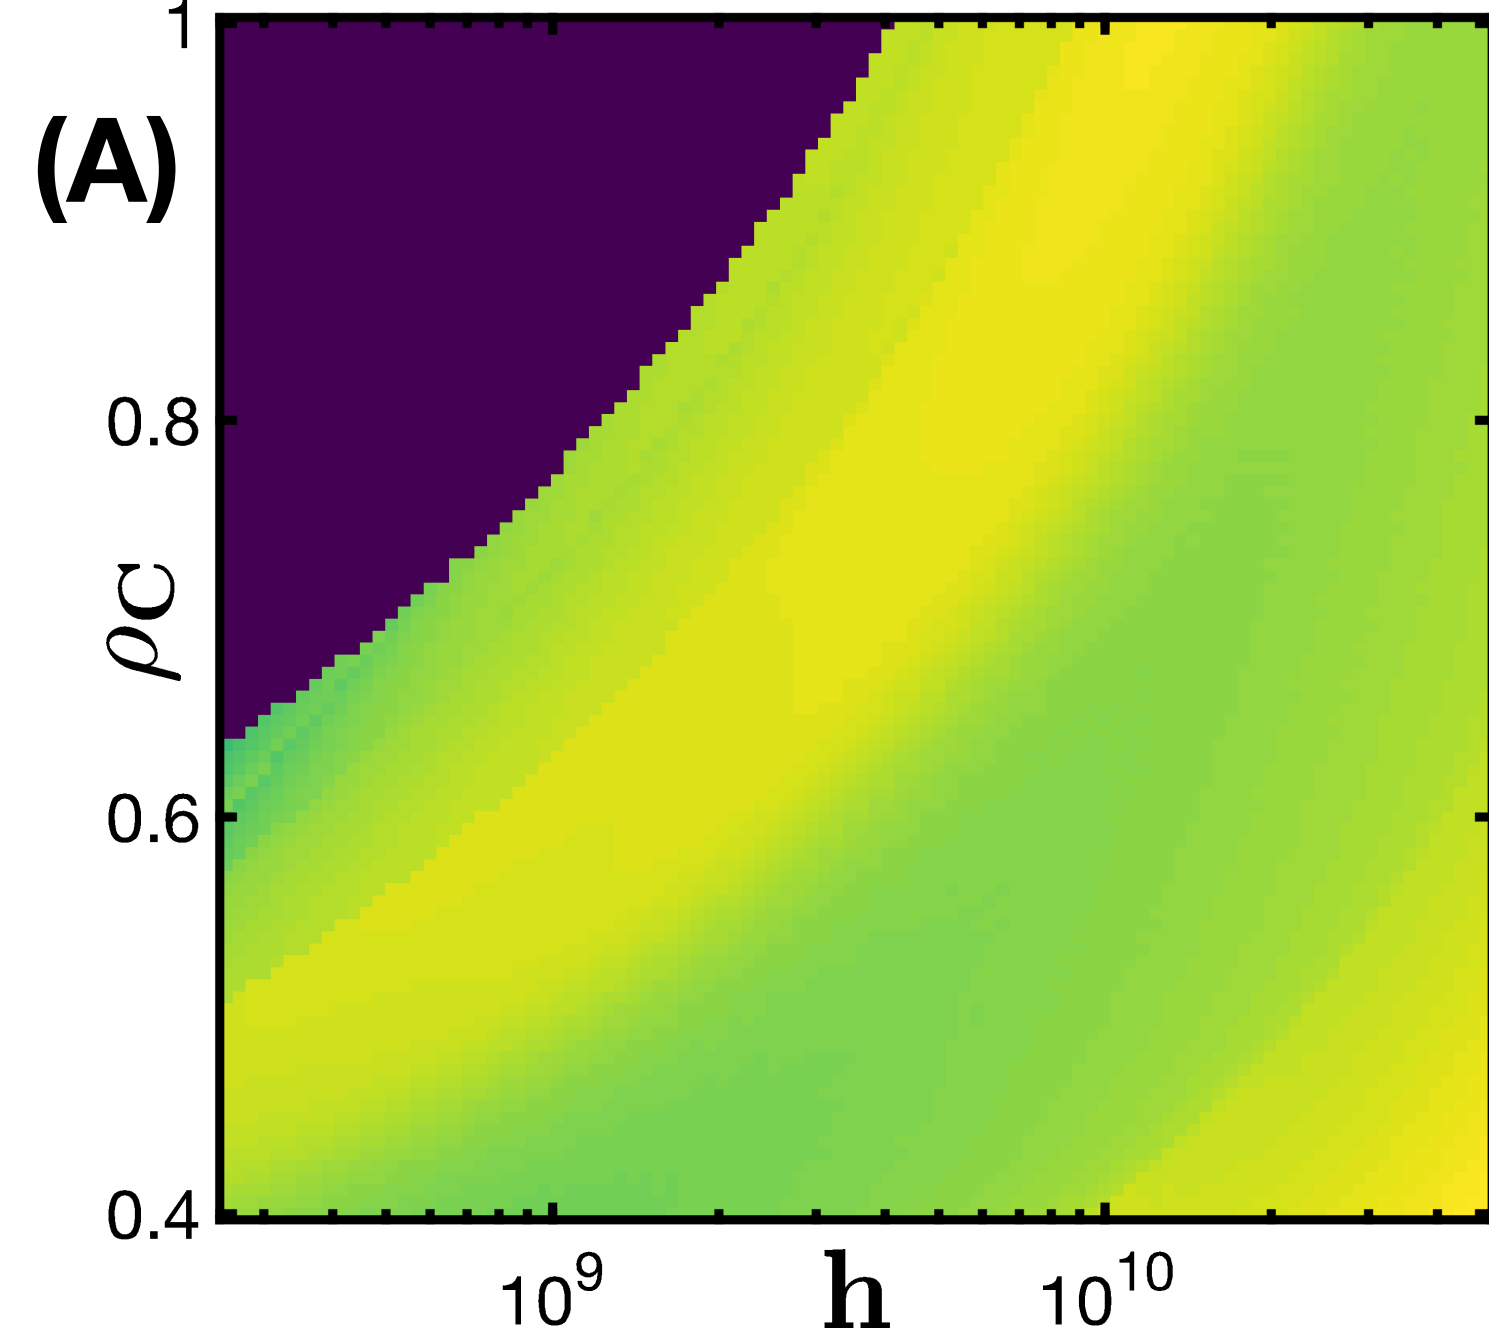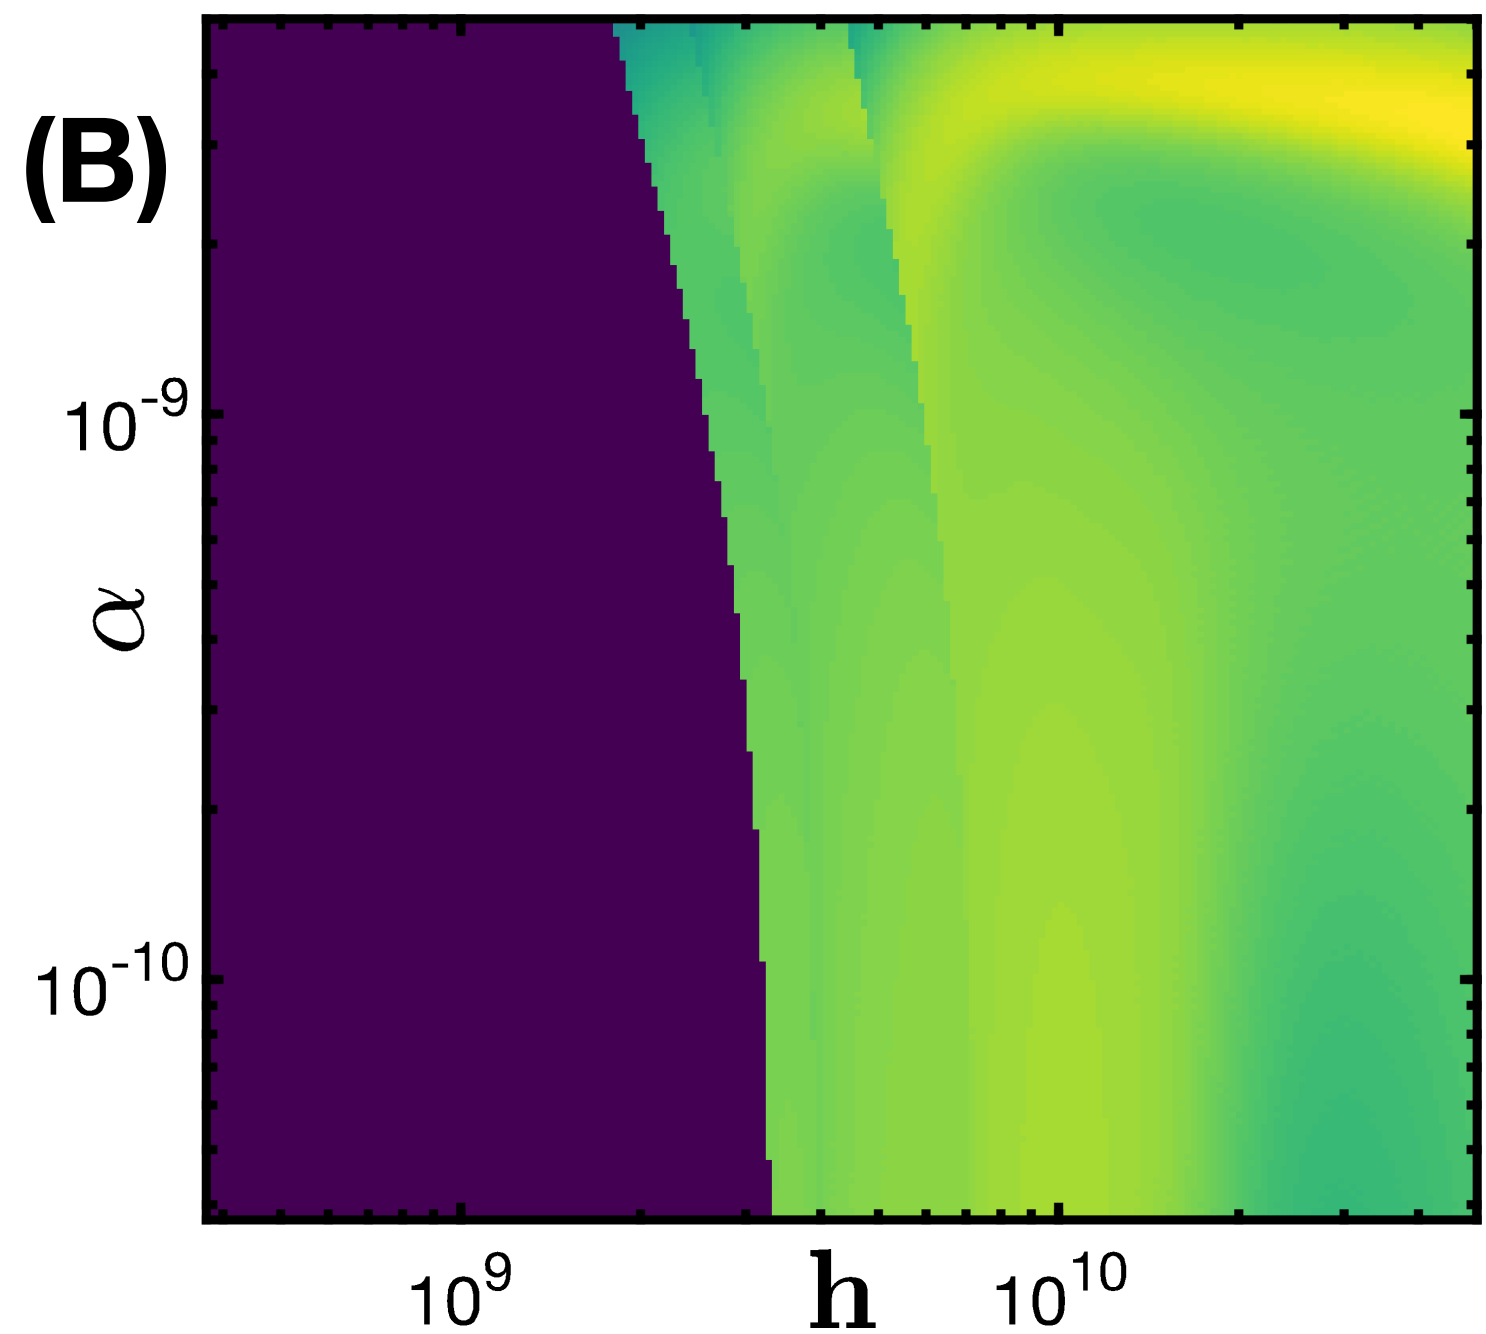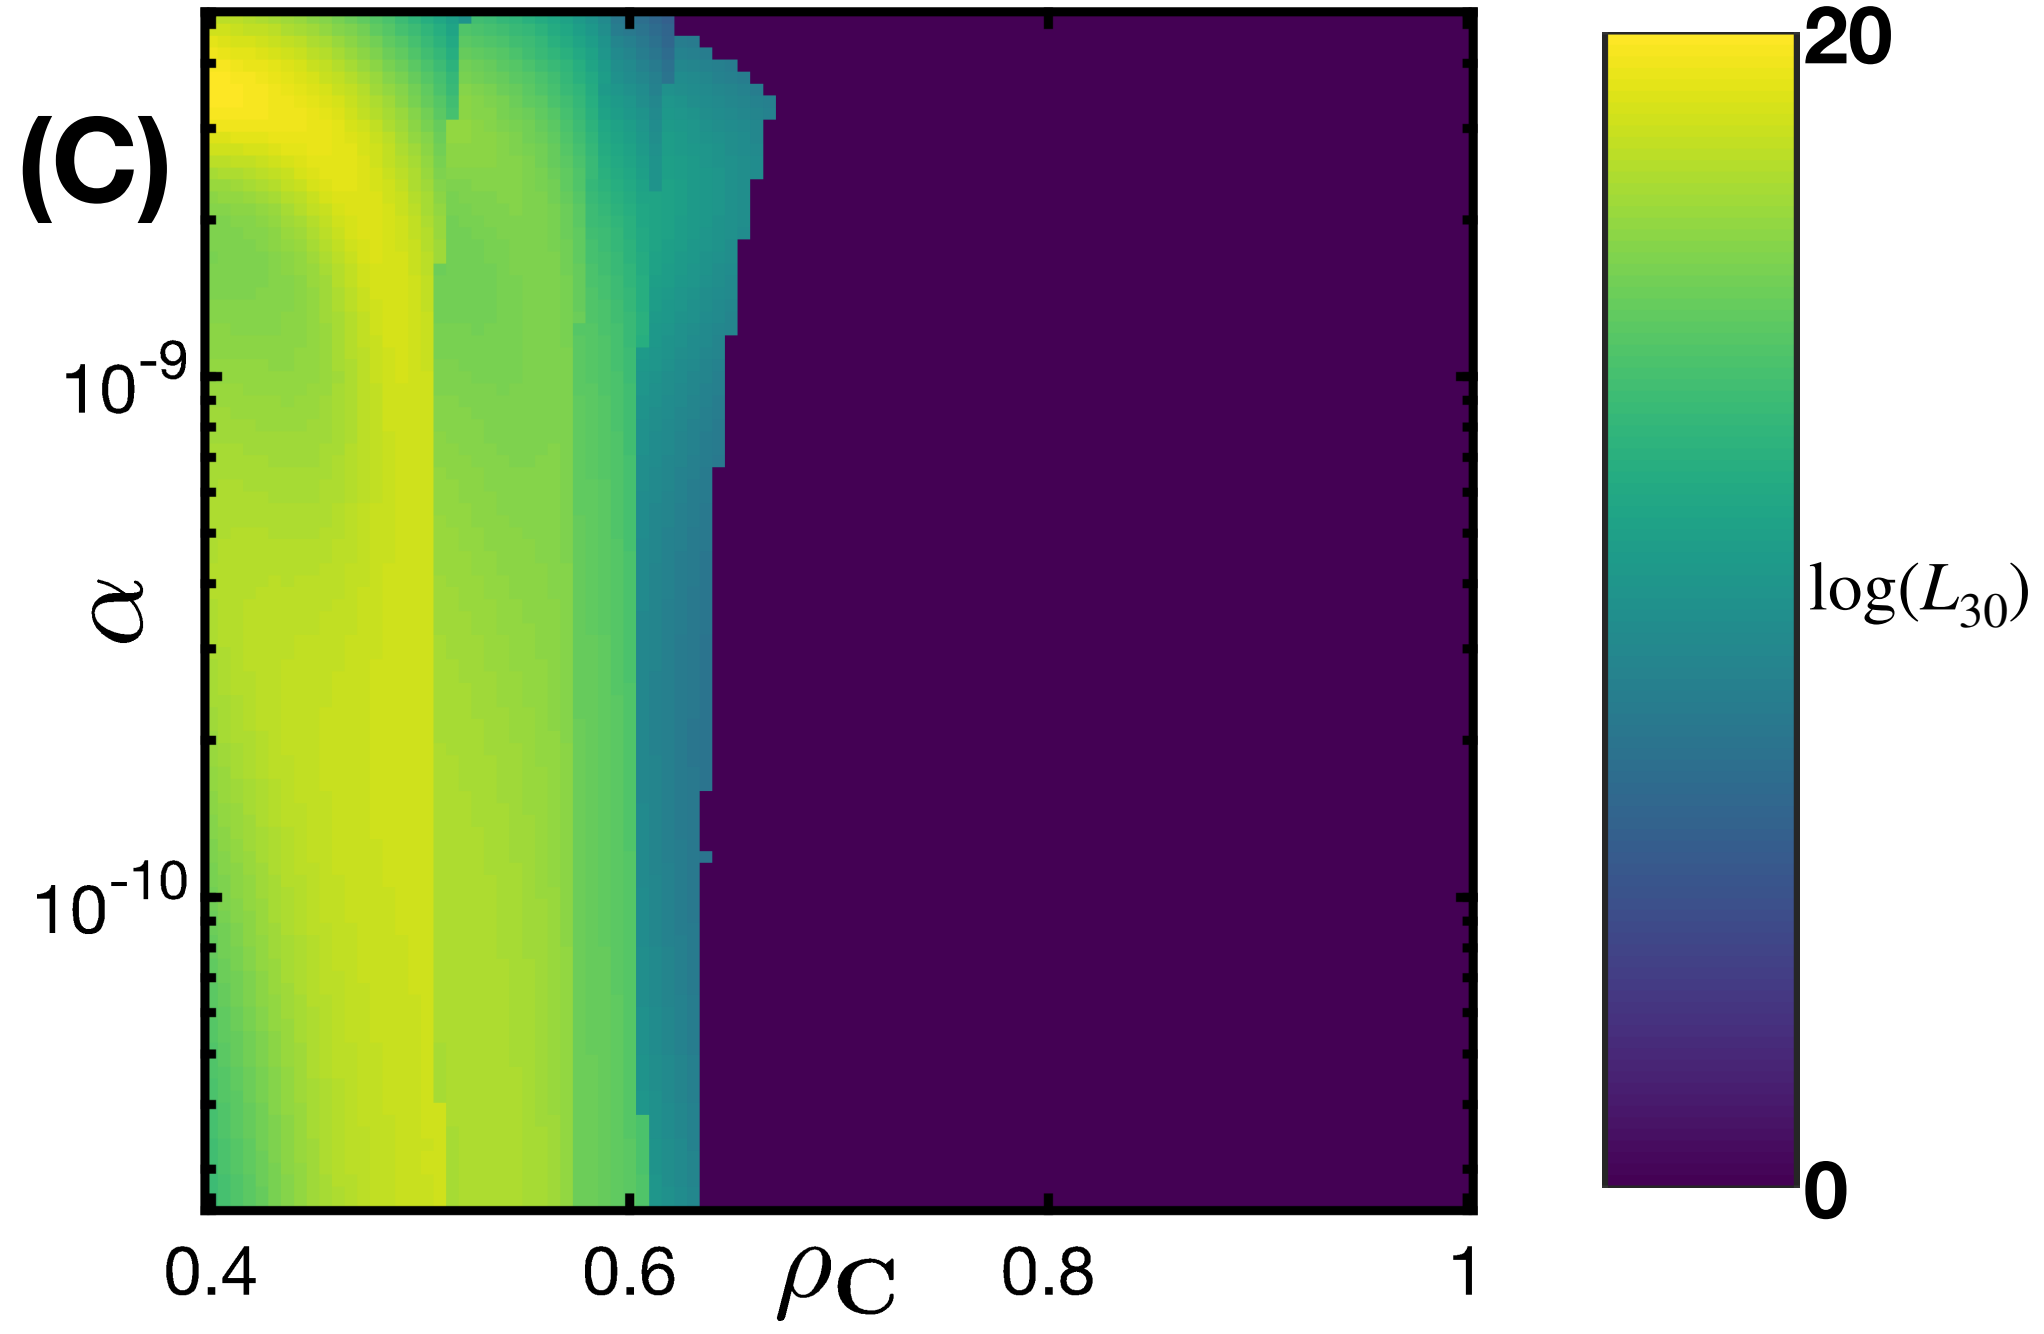

Supplement: Supplementary file 9 [file supplementary]
